# Supplementary material for: A reversible dendrite-free high-areal-capacity lithium metal electrode
Source: PubMed Central journal article supplement (PMC5414052; doi:10.1038/ncomms15106), 2017-04-25
Supplement: ncomms15106-s1.pdf [file ncomms15106-s1.pdf]

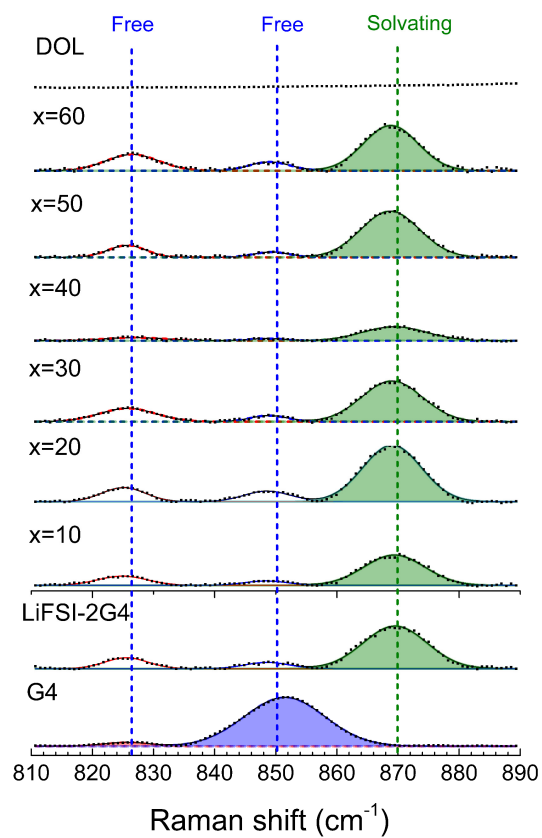

**Supplementary Figure 1.** Raman spectra for LiFSI-2G4-x vol% DOL in the frequency ranges of 810–890  $\text{cm}^{-1}$  at 298 K.

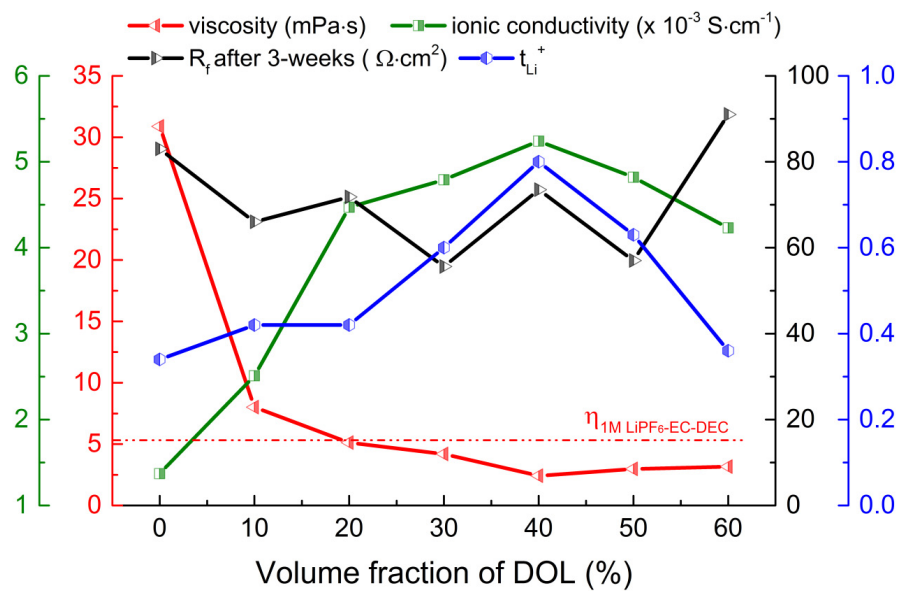

**Supplementary Figure 2.** Physiochemical and electrochemical properties of LiFSI-2G4- x vol% DOL at 25 °C.

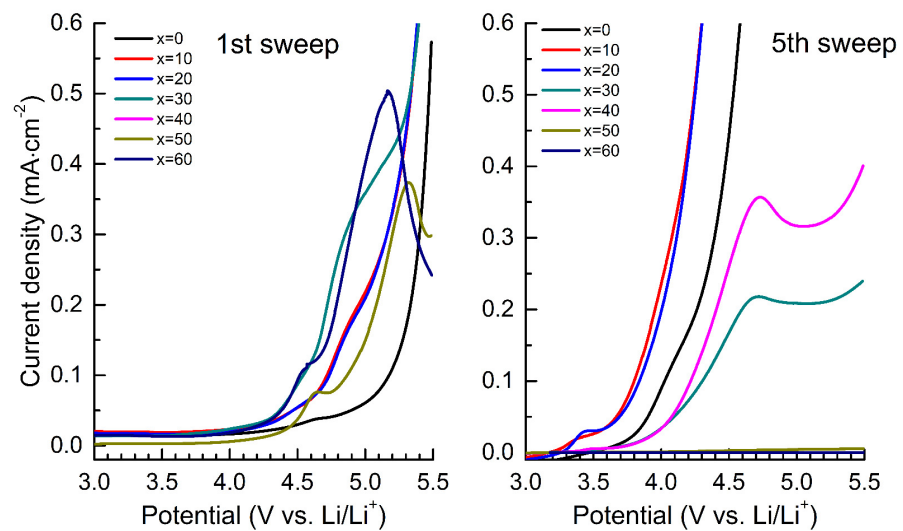

**Supplementary Figure 3.** Electrochemical stability of LiFSI-2G4-x vol% DOL using CV sweeps in the coin cell of Li/stainless steel electrode.

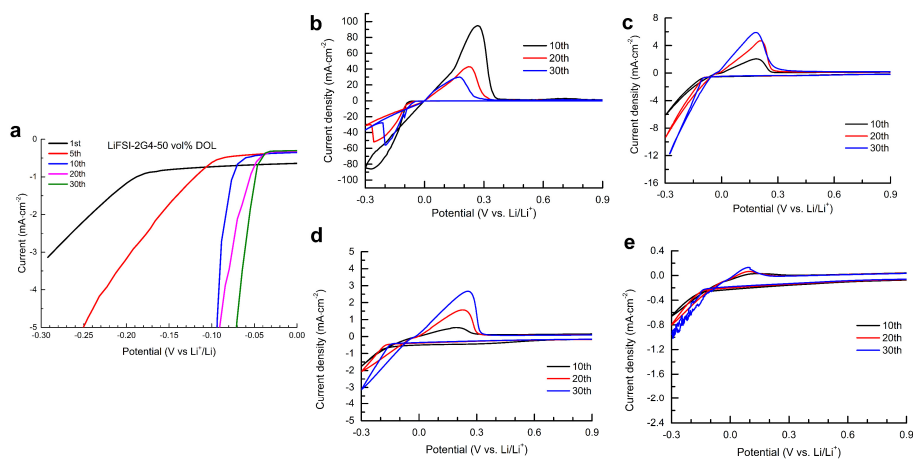

**Supplementary Figure 4.** Cyclic voltammograms of Li deposition/stripping in different electrolytes using Cu as the working electrode and Li as the reference and counter electrode. The scan rate was  $50 \text{ mV s}^{-1}$ . (a) the deposition behavior of lithium in LiFSI-2G4-50 vol% DOL at different cycles. (b) LiFSI-2G4-50 vol% DOL; (c) LiFSI-2G4; (d) LiFSI-G4; (e) LiFSI-2G4-50 vol% G4.

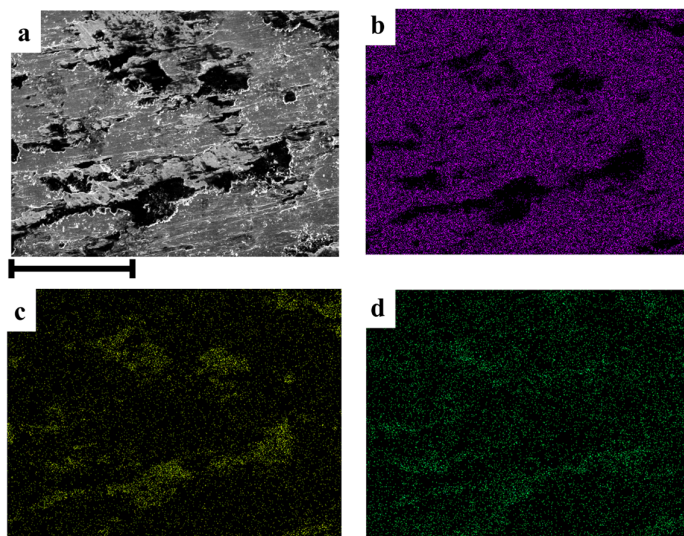

**Supplementary Figure 5.** EDX elemental mapping of Cu electrode after CV-premodulation. (a) Cu electrode (b) Cu-element mapping (c) O-element mapping (d) F-element mapping. Scale bar: 50  $\mu\text{m}$ .

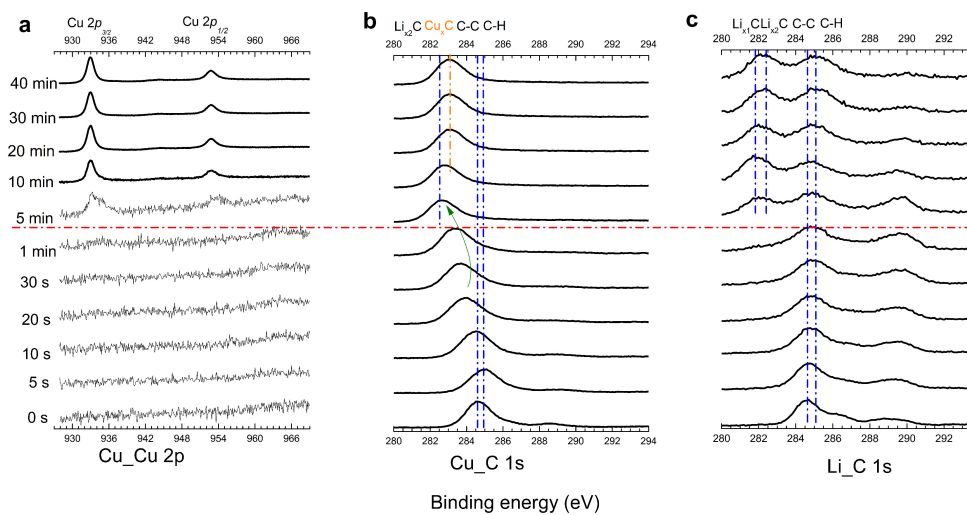

**Supplementary Figure 6.** A new SEI film chemistry formed onto Cu and native SEI of Li substrate in the LiFSI-2G4-50 vol% DOL by CV-premodulation.

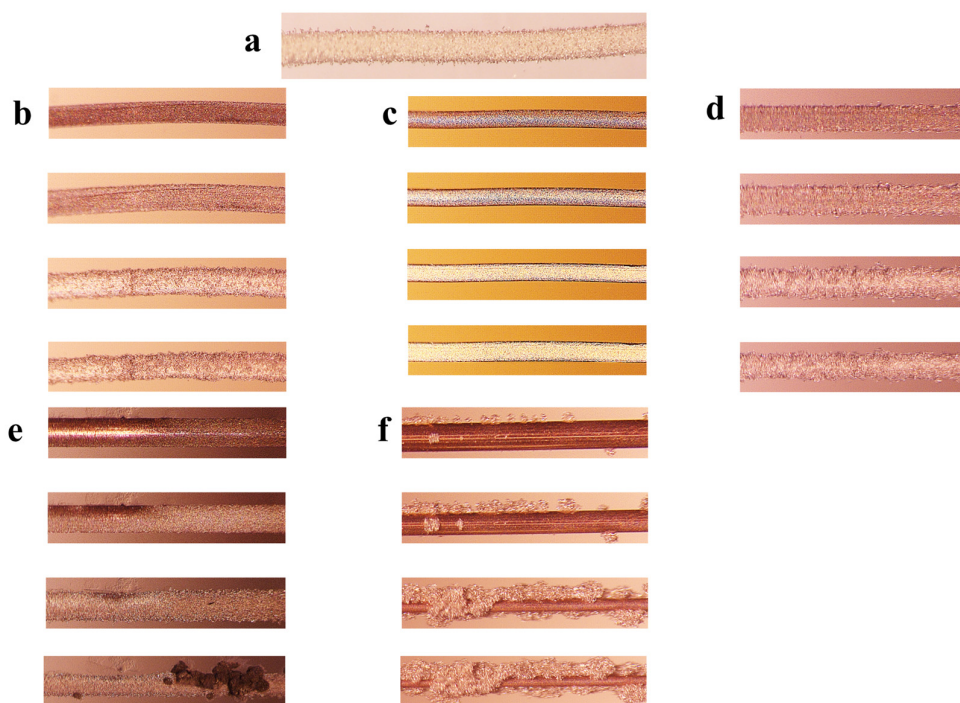

**Supplementary Figure 7.** Morphology evolution of electrodeposited lithium with time on the Cu electrode in different electrolytes. (a) the electrodeposited Li from Fig. 1e at 120 min. (b-e) deposition-time dependence (0.5 min, 2 min, 12 min, 18 min) of morphology evolution of lithium electrodeposits at  $5 \text{ mA cm}^{-2}$  and ambient temperature after CV-premodulation in the LiFSI-2G4-50 vol% G4 (b), LiFSI-2G4-50 vol% DOL (c), LiFSI-2G4 (d), LiTFSI-2G4 (e) and LiPF<sub>6</sub>-EC-DEC (f), respectively.

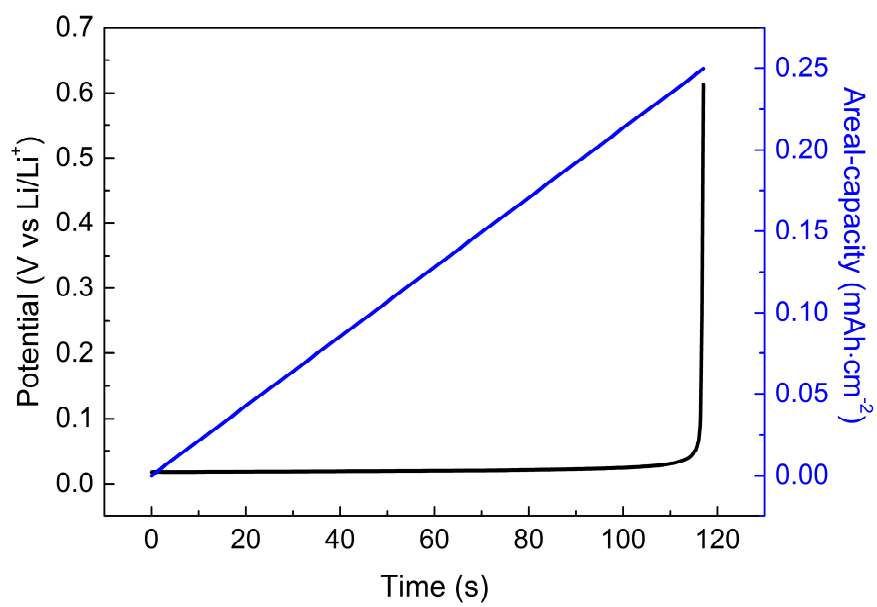

**Supplementary Figure 8.** Determination of  $Q_f$  by stripping Li from the Cu electrode of the Li/Cu cell after CV-premodulation at  $5.0 \text{ mA cm}^{-2}$ .



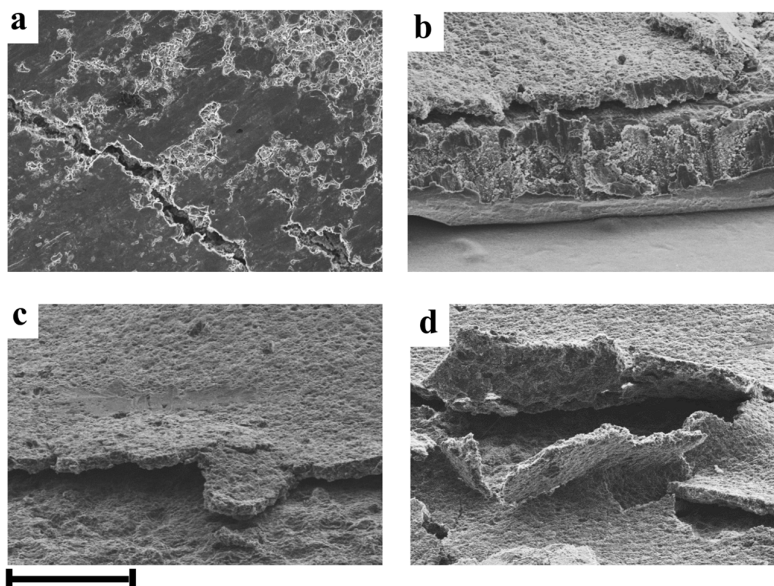

**Supplementary Figure 9** Morphology of the lithium electrode after 100 cycles at  $5.0 \text{ mA cm}^{-2}$  (top-surface view, cross-section view, inclined-plane view). Each figure has a different amplification. (a) scale bar:  $100 \text{ }\mu\text{m}$ ; (b-c) scale bar:  $200 \text{ }\mu\text{m}$ ; (d) scale bar:  $300 \text{ }\mu\text{m}$ .

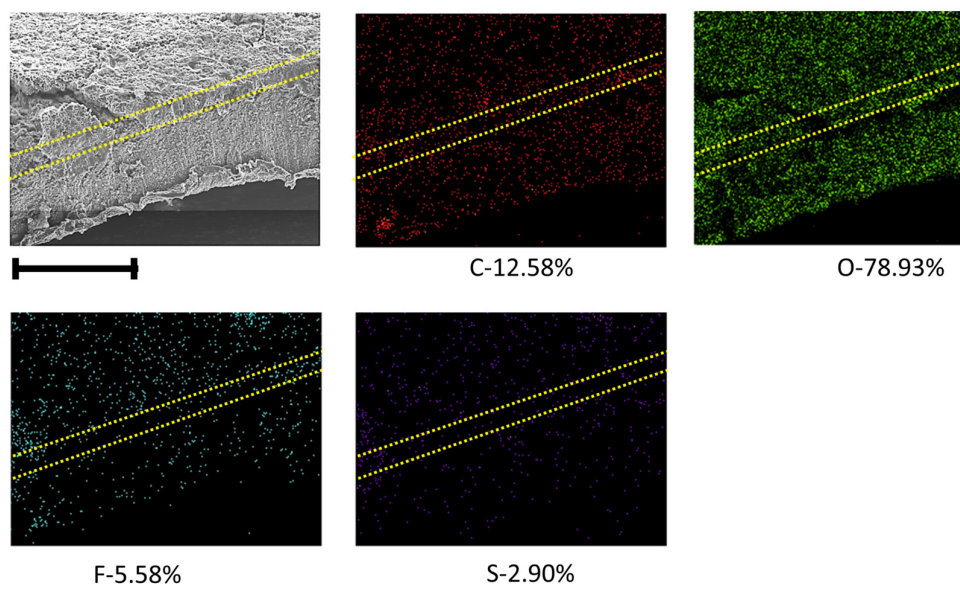

**Supplementary Figure 10.** EDX elemental mapping of the cross-sectional lithium electrode. The atomic percent is shown below the corresponding figure. Scale bar: 100  $\mu\text{m}$ .

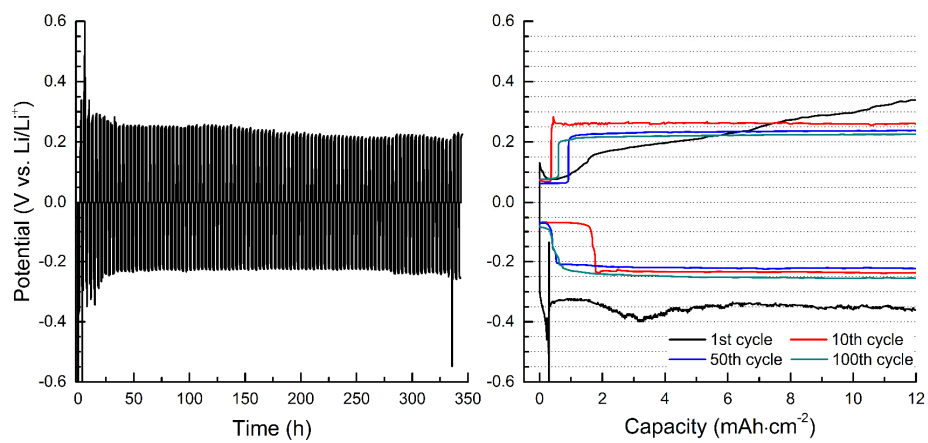

**Supplementary Figure 11.** Cyclic performance of a Li|Li cell at  $10.0 \text{ mA cm}^{-2}$  using LiFSI-2G4-50 vol% DOL. The delivered areal-capacity for each cycle was fixed at  $12 \text{ mAh cm}^{-2}$ . The right plot on the individual cycle is derived from the left plot.

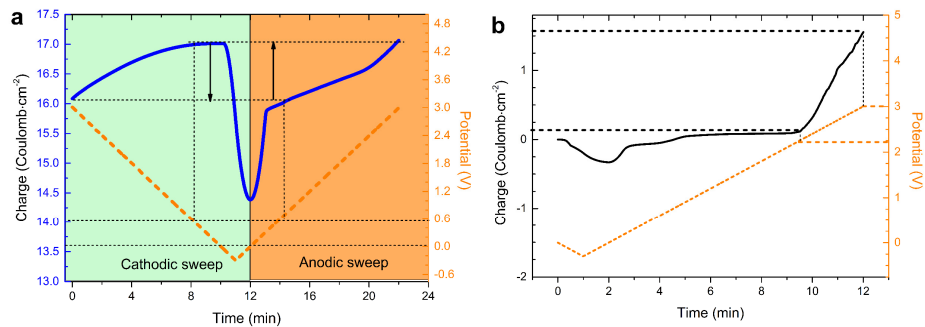

**Supplementary Figure 12.** Curves of charge vs. time for Li|Cu cells. (a) the 30<sup>th</sup>-sweep of a Li|Cu cell at 5.0 mV s<sup>-1</sup> and 25 °C in the range of -0.3-3.0 V. (b) the first-sweep of a Li|Cu cell at 5.0 mV s<sup>-1</sup> and 25 °C in the range of -0.3-3.0 V after five pre-sweeps at 5.0 mV s<sup>-1</sup> and 25 °C in the range of -0.3-0.9 V.

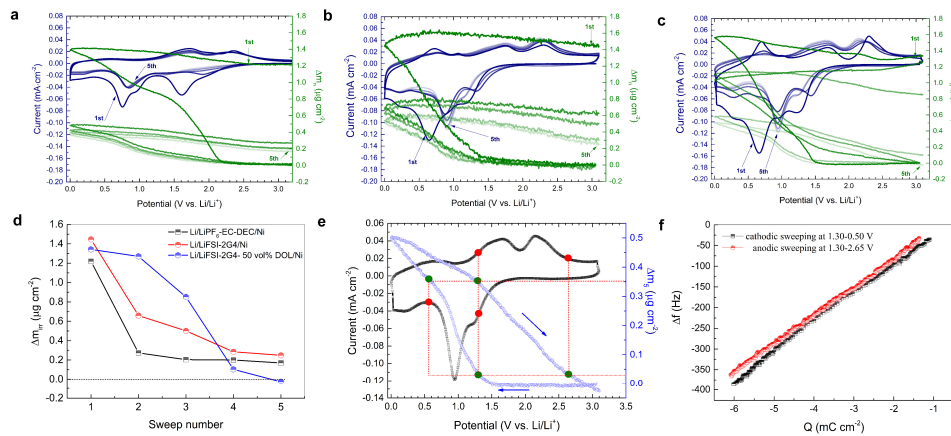

**Supplementary Figure 13.** Impact of CV-premodulation ahead of the bulk lithium electrodeposition. (a-c) in-situ CV/QCM study of three-electrode cells, where Ni is working electrode, using different electrolytes at  $10 \text{ mV s}^{-1}$  and ambient temperature in the range of 0-3.1 V. (a) 1 M LiPF<sub>6</sub>-EC-DEC; (b) LiFSI-2G4; (c) LiFSI-2G4-50 vol% DOL. (d) variation of  $\Delta m_{\text{irr}}$  of Ni upon sweeping in the different electrolytes. (e) in-situ CV/QCM study on the underpotential Li electrodeposition/stripping in the 5<sup>th</sup> sweep using LiFSI-2G4-50 vol% DOL (f)  $\Delta f$  vs.  $Q$  plots derived from different potential ranges of the fifth-sweep using the electrolyte of LiFSI-2G4-50 vol% DOL.

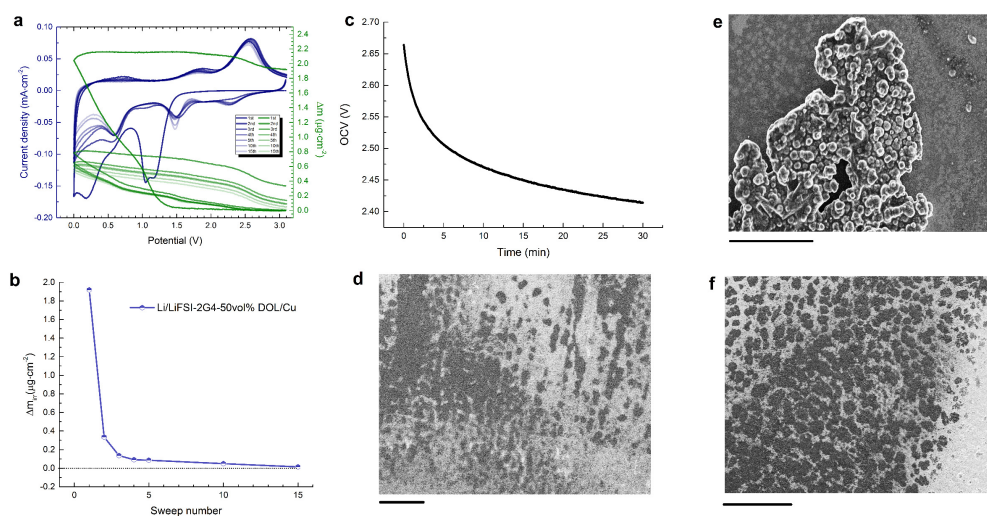

**Supplementary Figure 14.** Impact of CV-premodulation ahead of the bulk lithium electrodeposition. (a) in-situ CV/QCM study of three-electrode cells using Cu as the working electrode in the DSIL of LiFSI-2G4-50 vol % DOL at  $10 \text{ mV s}^{-1}$  and ambient temperature in the range of 0-3.1 V. (b) variation of  $\Delta m_{irr}$  of Cu upon sweeping in the DSIL of LiFSI-2G4-50 vol% DOL. (c) OCV decay of Li|Cu cells with time after twenty-sweeps with a sweep-rate of  $5 \text{ mV s}^{-1}$  in the range of 0-3.0 V. (d, e) patch film and dendrite-free particles of lithium electrodeposition observed onto Cu substrate disassembled from the cell (f) and the cell of Fig. 3 (d). Scale bar: (d)-500  $\mu\text{m}$ ; (e)-20  $\mu\text{m}$ ; (f)-500  $\mu\text{m}$ .

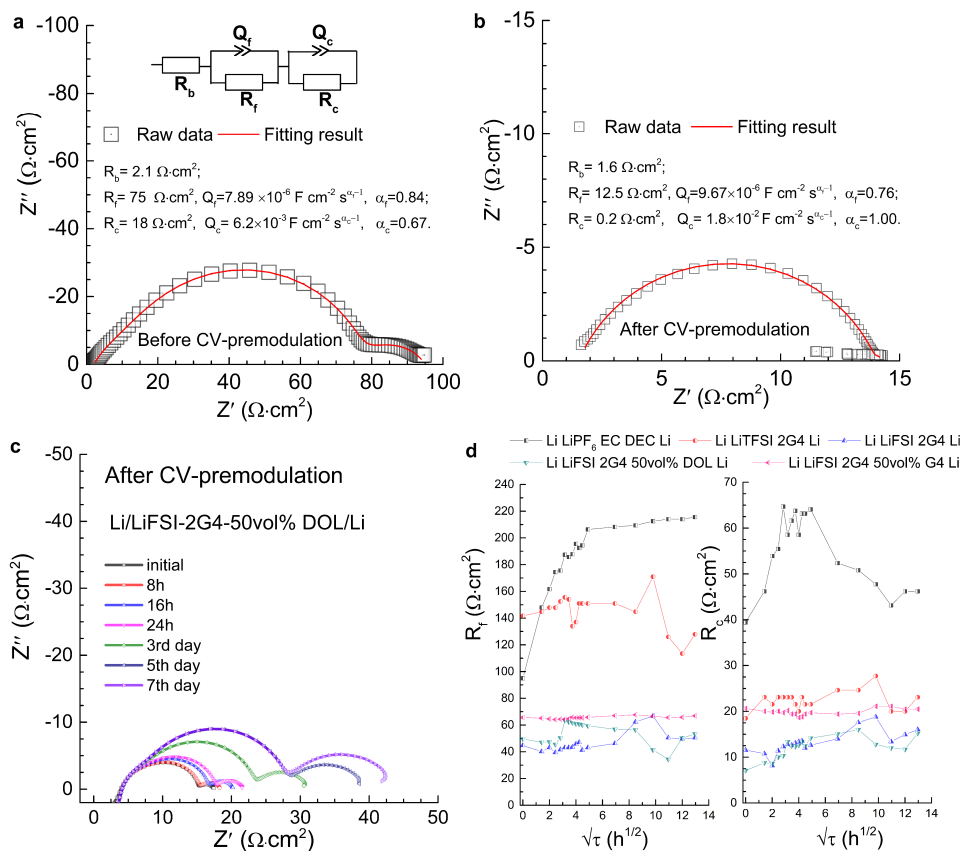

**Supplementary Figure 15.** Impedance spectra of symmetrical Li|Li cells. (a, b) fitting results of two typical impedance spectra using the equivalent circuit model; (c) impedance evolution of symmetrical Li|Li cell with the recovery-time after the CV-premodulation using LiFSI-2G4-50 vol% DOL; (d)  $R_f$  and  $R_c$  evolution of symmetrical Li|Li cell in the different electrolytes with the static aging-time at 25 °C.

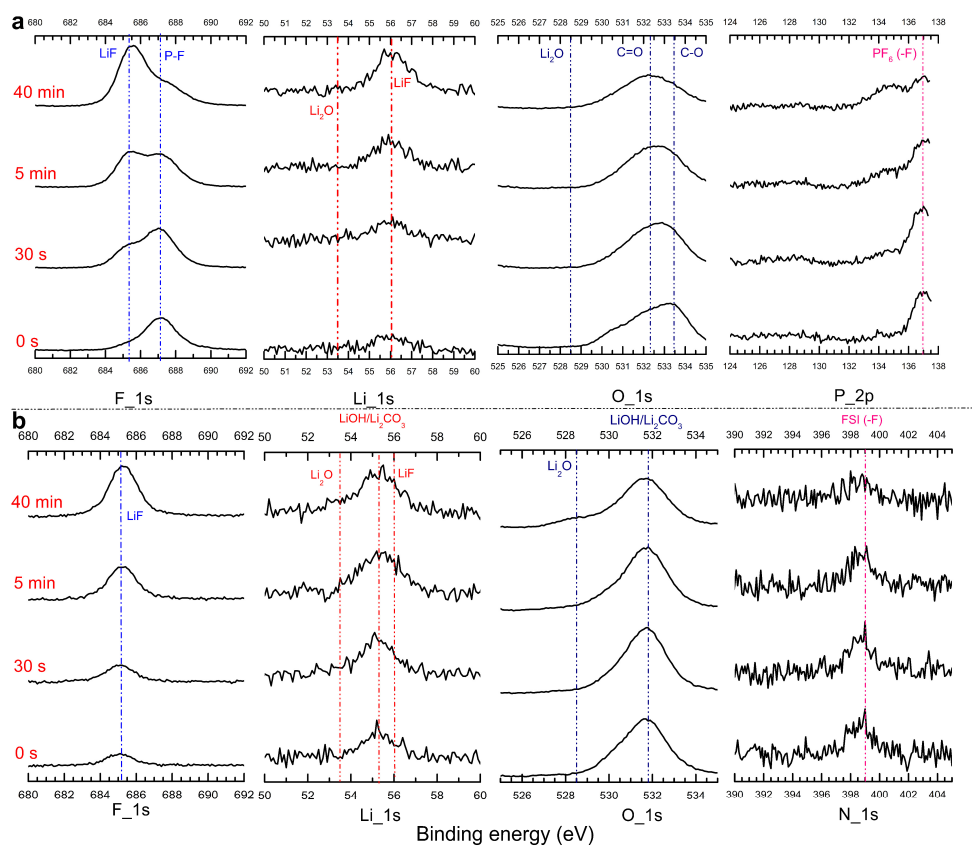

**Supplementary Figure 16.** Surface film chemistry of the metallic lithium electrode. (a) in 1M LiPF<sub>6</sub> in EC-DEC and (b) in LiFSI-2G4.



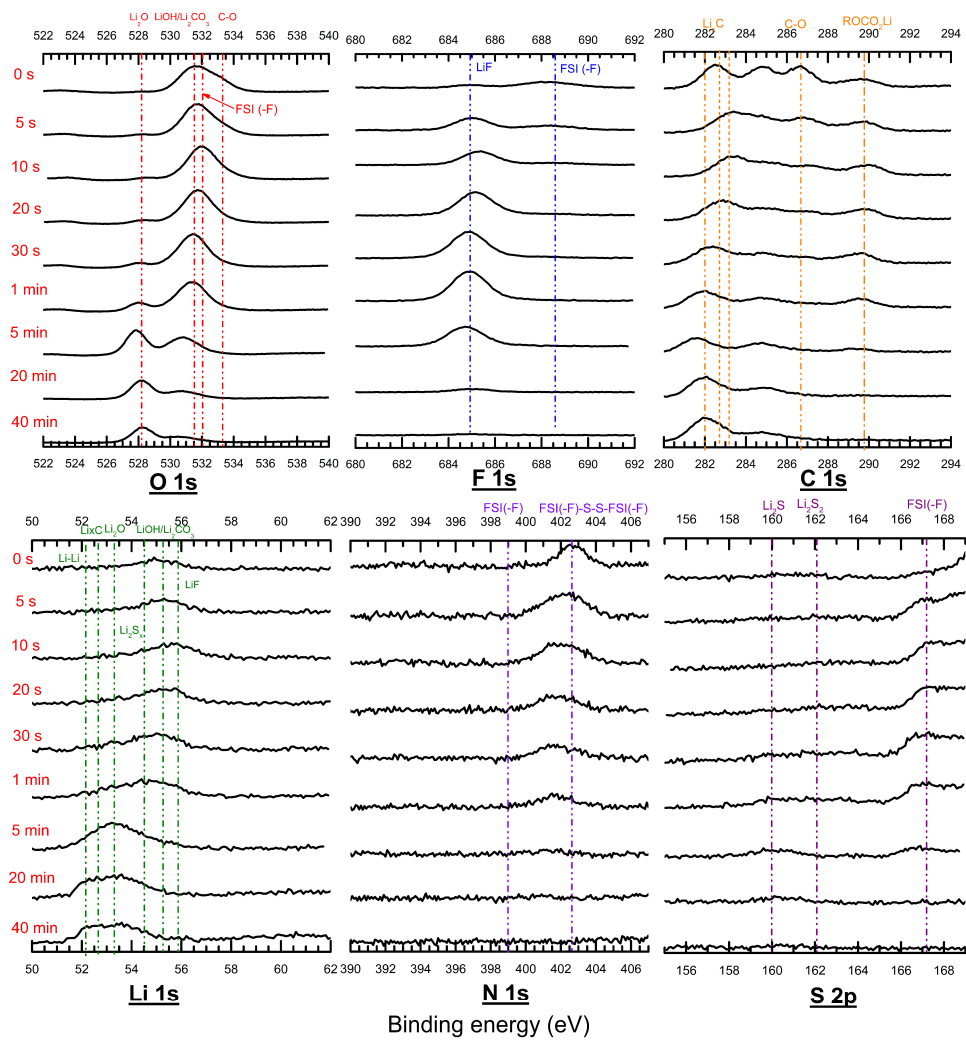

**Supplementary Figure 17.** Surface film chemistry of the metallic lithium electrode in contact with LiFSI-2G4-50 vol% DOL.

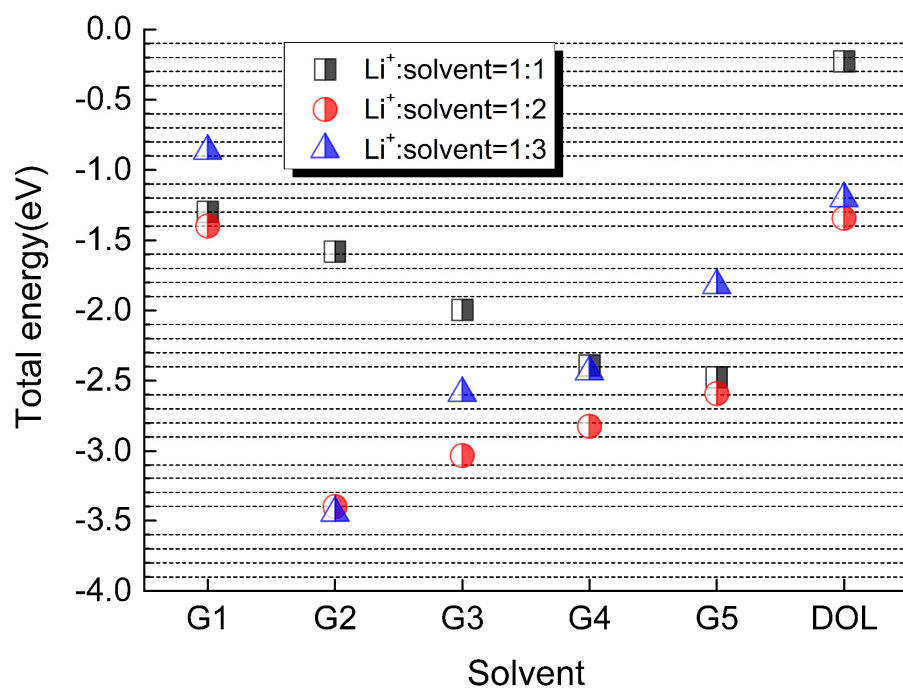

**Supplementary Figure 18.** Solvent-dependent total energy for the most-stable coordination structure between Li<sup>+</sup> and solvent in various molar ratios.

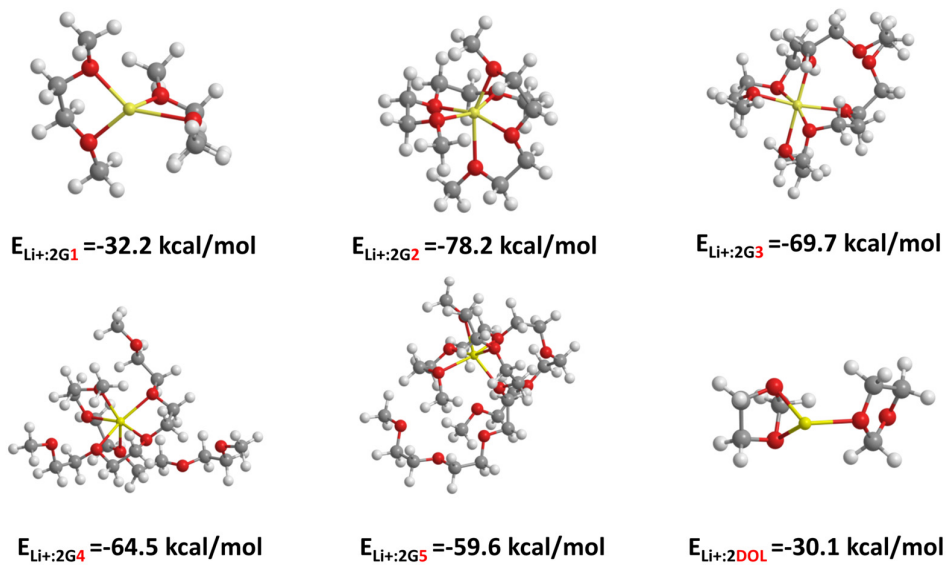

**Supplementary Figure 19.** Simulation results on the most-stable coordination structure between  $\text{Li}^+$  and solvent.

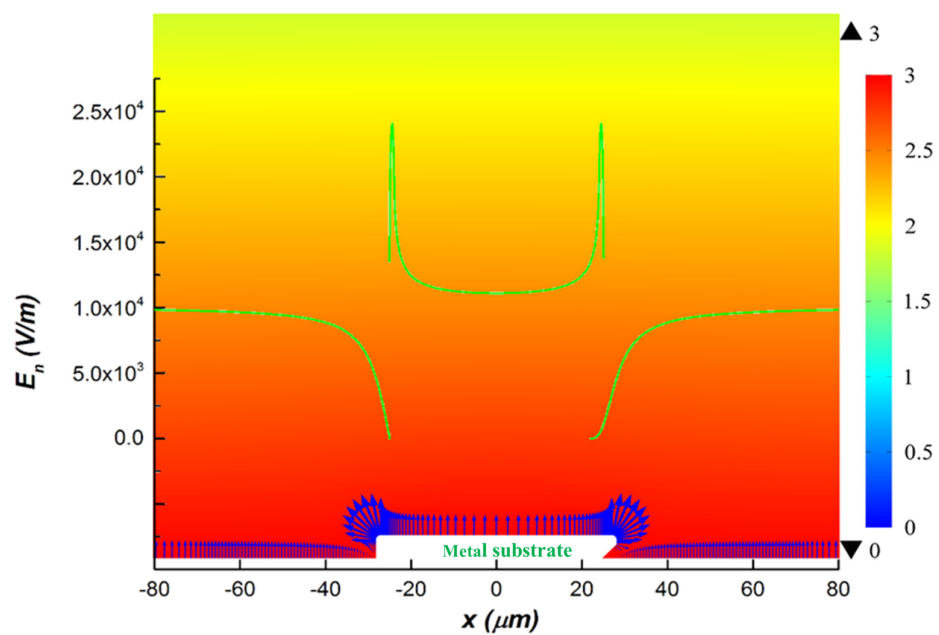

**Supplementary Figure 20.** The simulation of electric field distribution across planar metal patch under 3.0 V. (height: 5  $\mu\text{m}$ ; width: 50  $\mu\text{m}$ ).
